# Supplementary material for: Dynamic Evolution, Regional Differences, and Spatial Spillover Effects of Urban Ecological Welfare Performance in China from the Perspective of Ecological Value
Source: MDPI journal article supplement (doi:10.3390/ijerph192316271), 2022-12-05
Supplement: s1 [file s1]

Table S1. List of 287 cities

| Province                                           | City                                                                                                                                                                        |
|----------------------------------------------------|-----------------------------------------------------------------------------------------------------------------------------------------------------------------------------|
| municipality directly under the Central Government | Beijing, Tianjin, Shanghai, Chongqing                                                                                                                                       |
| Hebei                                              | Shi Jiazhuang, Tangshan, Qin Huangdao, Handan, Xingtai, Baoding, Zhang Jiakou, Chengde, Cangzhou, Langfang, Hengshui                                                        |
| Shanxi                                             | Taiyuan, Datong, Yangquan, Changzhi, Jincheng, Shuozhou, Jinzhong, Yuncheng, Xinzhou, Linfen, Lvliang                                                                       |
| Inner Mongolia Autonomous Region                   | Hohhot, Baotou, Wuhai, Chifeng, Tongliao, Erdos, Hulun Buir, Bayan Zhuoer, Wulan Chabu                                                                                      |
| Liaoning                                           | Shenyang, Dalian, Anshan, Fushun, Benxi, Dandong, Jinzhou, Yingkou, Fuxin, Liaoyang, Panjin, Tieling, Chaoyang, Hu Ludao                                                    |
| Jilin                                              | Changchun, Jilin, Siping, Liaoyuan, Tonghua, Baishan, Songyuan, Baicheng                                                                                                    |
| Hei Longjiang                                      | Harbin, Qiqihar, Jixi, Hegang, Shuang Yashan, Daqing, Yichun, Kiamusi, Qi Taihe, Mu Danjiang, Heihe, Suihua                                                                 |
| Jiangsu                                            | Nanjing, Wuxi, Xuzhou, Changzhou, Suzhou, Nantong, Lian Yungang, Huaian, Yancheng, Yangzhou, Zhenjiang, Taizhou, Suqian                                                     |
| Zhejiang                                           | Hangzhou, Ningbo, Wenzhou, Jiaxing, Huzhou, Shaoxing, Jinhua, Quzhou, Zhoushan, Taizhou, Lishui                                                                             |
| Anhui                                              | Hefei, Wuhu, Bengbu, Huainan, Ma Anshan, Huaibei, Tonglin, Anqing, Huangshan, Chuzhou, Fuyang, Suzhou, Liuan, Haozhou, Chizhou, Xuancheng                                   |
| Fujian                                             | Fuzhou, Xiamen, Putian, Sanming, Quanzhou, Zhangzhou, Nanping, Longyan, Ningde                                                                                              |
| Jiangxi                                            | Nanchang, Jing Dezhen, Pingxiang, Jiujiang, Xinyu, Yingtan, Ganzhou, Jian, Yichun, Fuzhou, Shangrao                                                                         |
| Shandong                                           | Jinan, Qingdao, Zibo, Zaozhuang, Dongying, Yantai, Weifang, Jining, Taian, Weihai, Rizhao, Laiwu, Linyi, Dezhou, Liaocheng, Binzhou, Heze                                   |
| Henan                                              | Zhengzhou, Kaifeng, Luoyang, Ping Dingshan, Anyang, Hebi, Xinxiang, Jiaozuo, Puyang, Xuchang, Luohe, San Menxia, Nanyang, Shangqiu, Xinyang, Zhoukou, Zhu Madian            |
| Hubei                                              | Wuhan, Huangshi, Shiyan, Yichang, Xiangyang, E-Zhou, Jingmen, Xiaogan, Jingzhou, Huanggang, Xianning, Suizhou                                                               |
| Hunan                                              | Changsha, Zhuzhou, Xiangtan, Hengyang, Shaoyang, Yueyang, Changde, Zhang Jiajie, Yiyang, Chenzhou, Yongzhou, Huaihua, Loudi                                                 |
| Guangdong                                          | Guangzhou, Shaoguan, Shenzhen, Zhuhai, Shantou, Foshan, Jiangmen, Zhanjiang, Maoming, Zaoqing, Huizhou, Meizhou, Shanwei, Heyuan, Yangjiang, Qingyuan, Dongguan, Zhongshan, |

|                                     |                                                                                                                                                                       |
|-------------------------------------|-----------------------------------------------------------------------------------------------------------------------------------------------------------------------|
|                                     | Chaozhou, Jieyang, Yunfu                                                                                                                                              |
| Guangxi Zhuang<br>Autonomous Region | Nanning, Liuzhou, Guilin, Wuzhou, Beihai, Fang Chenggang,<br>Qinzhou, Guigang, Yulin, Baise, Hezhou, Hechi, Laibin,<br>Chongzuo                                       |
| Hainan                              | Haikou, Sanya                                                                                                                                                         |
| Sichuan                             | Chengdu, Zigong, Pan Zhihua, Luzhou, Deyang, Mianyang,<br>Guangyuan, Suining, Neijiang, Leshan, Nanchong, Meishan,<br>Yibin, Guang-an, Dazhou, Ya-an, Bazhong, Ziyang |
| Guizhou                             | Guiyang, Liu Panshui, Zunyi, An Shun                                                                                                                                  |
| Yunnan                              | Kunming, Qujing, Yuxi, Baoshan, Shaotong, Lijiang, Puer,<br>Lincang                                                                                                   |
| Tibet Autonomous Region             | Lhasa                                                                                                                                                                 |
| Shaanxi                             | Xian, Tongchuan, Baoji, Xianyang, Weinan, Yan-an, Hanzhong,<br>Yulin, Ankang, Shangluo                                                                                |
| Gansu                               | Lanzhou, Jiayu, Jinchang, Baiyin, Tianshui, Wuwei, Zhangye,<br>Pingliang, Jiuquan, Qingyang, Dingxi, Longnan                                                          |
| Qinghai                             | Xining, Haidong                                                                                                                                                       |
| Ningxia Hui<br>Autonomous Region    | Yinchuan, Shi Zuishan, Wuzhong, Guyuan, Zhongwei                                                                                                                      |
| Xinjiang Uygur<br>Autonomous Region | Urumqi; Karamay                                                                                                                                                       |

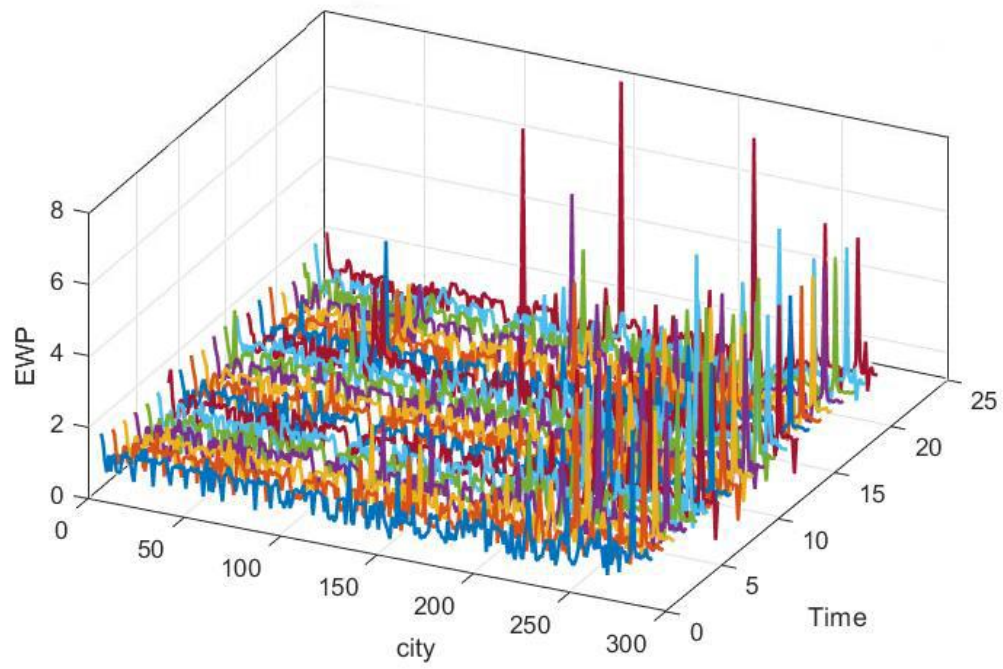

Figure S1. Results of urban EWP in 287 Cities from 2000 to 2020
